# Supplementary material for: Soil moisture products consistency for operational drought monitoring in Europe
Source: Copernicus journal article supplement (doi:10.5194/hess-2024-182), 2024-07-04
Supplement: Supplementary file 1 [file hess-2024-182-supplement.pdf]

Table S1 – List of the ISMN observation networks (Dorigo et al., 2021) used in the study.

| Network            | No. | Data availability | Country       | Climate  | Land Cover                      | Scale       | Type |
|--------------------|-----|-------------------|---------------|----------|---------------------------------|-------------|------|
| XMS-CAT            | 16  | from 2016 to 2023 | E Spain       | Cf, Cs   | Forest and shrubland            | Regional    | TDR- |
| WSMN               | 8   | from 2011 to 2016 | W UK          | Cf       | Pasture and woodlands           | Local       | TDR  |
| VAS                | 3   | from 2010 to 2012 | E Spain       | B        | Croplands and shrubland         | Local       | TDR  |
| UMSUOL             | 1   | from 2009 to 2017 | Italy         | Cs       | Croplands, irrigation           | Local       | TDR  |
| UDC_SMOS           | 11  | from 2007 to 2011 | S Germany     | Dfb      | Croplands and forest            | Regional    | TDR- |
| TWENTE             | 44  | from 2008 to 2021 | E Netherlands | Cf       | Croplands                       | Regional    | FDR  |
| TERENO             | 5   | from 2009 to 2023 | W Germany     | Cf-Dfb   | Croplands                       | Regional    | TDR  |
| SWEX_POLAND        | 6   | from 2000 to 2013 | E Poland      | Dfb      | Forest and shrubland            | Local       | TDR  |
| STEMS              | 4   | from 2015 to 2023 | N Italy       | Cs, Cf   | Croplands                       | Local       | FDR  |
| SMOSMANIA          | 22  | from 2007 to 2023 | S France      | Cf, Cs   | Croplands, shrubland and forest | Regional    | TDR  |
| Ru_CFR             | 2   | from 2015 to 2022 | W Russia      | Dfb      | Forest                          | Local       | TDR  |
| RSMN               | 20  | from 2014 to 2023 | Romania       | Dfb, Dfa | Forest, shrubland and croplands | Country     | FDR  |
| REMEDHUS           | 24  | from 2005 to 2023 | W Spain       | B        | Croplands                       | Local       | TDR  |
| ORACLE             | 6   | from 1985 to 2013 | N France      | Cf       | Croplands                       | Local       | TDR  |
| NVE                | 5   | from 2012 to 2021 | Norway        | Dfc, E   | Forest and openland             | Country     | FDR  |
| MOL_RAO            | 2   | from 2003 to 2020 | E Germany     | Dfb      | Forest                          | Local       | TDR  |
| IPE                | 2   | from 2008 to 2020 | N Spain       | Cf, B    | Forest, shrubland and croplands | Local       | TDR  |
| IMA_CAN1           | 12  | from 2011 to 2015 | N Italy       | Cs, Cf   | Croplands                       | Local       | FDR  |
| HYDROL-NET_PERUGIA | 2   | from 2010 to 2016 | C Italy       | Cs, Cf   | Forest and shrubland            | Local       | TDR  |
| HOBE               | 32  | from 2009 to 2019 | Denmark       | Cf, Dfb  | Forest, pasture and croplands   | Regional    | FDR  |
| HOAL               | 33  | from 2013 to 2021 | E Austria     | Dfb      | Forest, pasture and croplands   | Local       | TDR  |
| GTK                | 7   | from 2001 to 2012 | Finland       | Dfc      | Forest                          | Country     | TDR  |
| GROW               | 151 | from 2017 to 2019 | Europe        | Cf, Dfb, | Various                         | Continental | FDR  |
| FR_Aqui            | 5   | from 2012 to 2023 | SW France     | Cs       | Forest                          | Local       | TDR  |
| FMI                | 27  | from 2007 to 2023 | N Finland     | Dfc      | Forest                          | Regional    | TDR  |
| BIEBRZA_S-1        | 30  | from 2015 to 2018 | E Poland      | Dfb      | Forest                          | Local       | FDR  |

1000  
1001  
1002  
1003  
1004
